# Supplementary material
Source: MDPI journal article supplement (https://www.mdpi.com/2072-4292/14/11/2533)
Supplement: s1 [file s1]

Supplementary information

# Ozone profiles, precursors, and Vertical Distribution in Urban Lhasa, Tibetan Plateau

Jiayan Yu <sup>1,2,3</sup>, Lingshuo Meng <sup>4</sup>, Yang Chen <sup>4\*\*</sup>, Huifang Zhang <sup>5</sup> and Jianguo Liu <sup>1\*</sup>

<sup>1</sup> Key Laboratory of Environmental Optics and Technology, Anhui Institute of Optics and Fine Mechanics, Chinese Academy of Sciences, Hefei 230031, China; yujiayankk@163.com (J.Y.);

<sup>2</sup> University of Science and Technology of China, Hefei 230026, China;

<sup>3</sup> Chongqing Eco-Environmental Monitoring Center, Chongqing 401147, China;

<sup>4</sup> Chongqing Institute of Green and Intelligent Technology, Chinese Academy of Sciences, Chongqing 400714, China; [menglingshuo@cigit.ac.cn](mailto:menglingshuo@cigit.ac.cn) (L.M.); [chenyang@cigit.ac.cn](mailto:chenyang@cigit.ac.cn) (Y.C.)

<sup>5</sup> Tibet Eco-Environmental Monitoring Center, Lhasa 850031, China; 527310148@qq.com (H.Z.)

\* Correspondence: Jianguo Liu ([jgliu@aiofm.ac.cn](mailto:jgliu@aiofm.ac.cn)), Yang Chen ([chenyang@cigit.ac.cn](mailto:chenyang@cigit.ac.cn))

| NO | Compounds       | CAS<br>NO | Category                 | MDL   | R <sup>2</sup> | Accuracy |
|----|-----------------|-----------|--------------------------|-------|----------------|----------|
| 1  | ethane          | 74-84-0   | alkane                   | 0.016 | 0.9977         | 0.87%    |
| 2  | ethylene        | 74-85-1   | alkene                   | 0.026 | 0.9961         | 1.01%    |
| 3  | propane         | 74-98-6   | alkane                   | 0.02  | 0.9977         | 0.71%    |
| 4  | propylene       | 115-07-1  | alkene                   | 0.031 | 0.9966         | 0.83%    |
| 5  | isobutane       | 75-28-5   | alkane                   | 0.02  | 0.9971         | 0.77%    |
| 6  | acetylene       | 74-86-2   | alkyne                   | 0.02  | 0.9971         | 0.65%    |
| 7  | N-Butane        | 106-97-8  | alkane                   | 0.022 | 0.9975         | 0.74%    |
| 8  | Trans-2-butene  | 624-64-6  | alkene                   | 0.011 | 0.9966         | 0.53%    |
| 9  | 1-Butene        | 106-98-9  | alkene                   | 0.011 | 0.9967         | 0.36%    |
| 10 | cis-2-butene    | 590-18-1  | alkene                   | 0.009 | 0.9962         | 0.74%    |
| 11 | cyclopentane    | 287-92-3  | alkane                   | 0.009 | 0.9965         | 0.49%    |
| 12 | Isopentane      | 78-78-4   | alkane                   | 0.005 | 0.9973         | 0.77%    |
| 13 | pentane         | 109-66-0  | alkane                   | 0.005 | 0.9971         | 0.50%    |
| 14 | Freon 12        | 75-71-8   | Halogenated hydrocarbons | 0.05  | 0.9996         | 2.75%    |
| 15 | Freon 114       | 76-14-2   | Halogenated hydrocarbons | 0.002 | 0.9996         | 2.87%    |
| 16 | methyl chloride | 74-87-3   | Halogenated hydrocarbons | 0.007 | 0.9969         | 3.76%    |
| 17 | vinyl chloride  | 27398     | Halogenated hydrocarbons | 0.042 | 0.9996         | 1.71%    |
| 18 | 1,3-Butadiene   | 106-99-0  | alkene                   | 0.037 | 0.9995         | 2.98%    |
| 19 | methyl bromide  | 74-83-9   | Halogenated hydrocarbons | 0.024 | 0.9994         | 2.98%    |
| 20 | Chloroethane    | 75-00-3   | Halogenated hydrocarbons | 0.031 | 0.9995         | 3.27%    |
| 21 | Freon 11        | 75-69-4   | Halogenated hydrocarbons | 0.046 | 0.9998         | 3.77%    |

|    |                         |           |                          |       |        |       |
|----|-------------------------|-----------|--------------------------|-------|--------|-------|
| 22 | 1-Pentene               | 109-67-1  | alkene                   | 0.009 | 0.9977 | 3.27% |
| 23 | Trans-2-pentene         | 646-04-8  | alkene                   | 0.004 | 0.9983 | 3.80% |
| 24 | isoprene                | 78-79-5   | Natural source           | 0.02  | 0.9971 | 3.13% |
| 25 | Cis-2-pentene           | 627-20-3  | alkene                   | 0.016 | 0.9975 | 3.75% |
| 26 | acrolein                | 107-02-8  | OVOCs                    | 0.05  | 0.9965 | 4.34% |
| 27 | 1,1-Dichloroethylene    | 75-35-4   | Halogenated hydrocarbons | 0.031 | 0.9997 | 3.85% |
| 28 | Freon 113               | 76-13-1   | Halogenated hydrocarbons | 0.027 | 0.9998 | 2.08% |
| 29 | 2,2-Dimethylbutane      | 75-83-2   | alkane                   | 0.005 | 0.9979 | 3.25% |
| 30 | acetone                 | 67-64-1   | OVOCs                    | 0.05  | 0.9965 | 4.15% |
| 31 | carbon disulfide        | 75-15-0   | Organic sulfur           | 0.033 | 0.9997 | 4.37% |
| 32 | isopropanol             | 67-63-0   | OVOCs                    | 0.009 | 0.9981 | 4.92% |
| 33 | 2,3-Dimethylbutane      | 79-29-8   | alkane                   | 0.013 | 0.997  | 3.28% |
| 34 | dichloromethane         | 75-09-2   | Halogenated hydrocarbons | 0.037 | 0.9995 | 3.94% |
| 35 | 2-Methylpentane         | 107-83-5  | alkane                   | 0.04  | 0.995  | 4.86% |
| 36 | 3-Methylpentane         | 96-14-0   | alkane                   | 0.007 | 0.9974 | 3.45% |
| 37 | Methyl tert-butyl ether | 1634-04-4 | OVOCs                    | 0.015 | 0.9992 | 3.59% |
| 38 | 1-Hexene                | 592-41-6  | alkene                   | 0.011 | 0.9977 | 4.01% |
| 39 | Hexane                  | 110-54-3  | alkane                   | 0.016 | 0.9998 | 2.83% |
| 40 | 1,1-Dichloroethane      | 75-34-3   | Halogenated hydrocarbons | 0.031 | 0.9999 | 3.68% |
| 41 | Vinyl acetate           | 108-05-4  | OVOCs                    | 0.015 | 0.9998 | 3.20% |
| 42 | 2,4-Dimethylpentane     | 108-08-7  | alkane                   | 0.007 | 0.9975 | 3.45% |
| 43 | Methylcyclopentane      | 96-37-7   | alkane                   | 0.015 | 0.9976 | 3.53% |

|    |                            |          |                          |       |        |       |
|----|----------------------------|----------|--------------------------|-------|--------|-------|
| 44 | Trans-1,2-dichloroethylene | 156-60-5 | Halogenated hydrocarbons | 0.02  | 0.9997 | 4.04% |
| 45 | cis-1,2-Dichloroethylene   | 156-59-2 | Halogenated hydrocarbons | 0.024 | 0.9998 | 3.31% |
| 46 | 2-Butanone                 | 78-93-3  | OVOCs                    | 0.05  | 0.9965 | 4.29% |
| 47 | ethyl acetate              | 141-78-6 | OVOCs                    | 0.029 | 0.9971 | 4.91% |
| 48 | Tetrahydrofuran            | 109-99-9 | OVOCs                    | 0.022 | 0.9996 | 3.57% |
| 49 | trichloromethane           | 67-66-3  | Halogenated hydrocarbons | 0.029 | 0.9997 | 4.34% |
| 50 | 1,1,1-Trichloroethane      | 71-55-6  | Halogenated hydrocarbons | 0.027 | 0.9998 | 3.61% |
| 51 | 2-Methylhexane             | 591-76-4 | alkane                   | 0.011 | 0.9975 | 3.50% |
| 52 | Cyclohexane                | 110-82-7 | alkane                   | 0.02  | 0.9998 | 3.04% |
| 53 | 2,3-Dimethylpentane        | 565-59-3 | alkane                   | 0.007 | 0.9977 | 3.16% |
| 54 | carbon tetrachloride       | 56-23-5  | Halogenated hydrocarbons | 0.024 | 0.9998 | 3.42% |
| 55 | 3-Methylhexane             | 589-34-4 | alkane                   | 0.016 | 0.9976 | 4.10% |
| 56 | benzene                    | 71-43-2  | Aromatic hydrocarbons    | 0.018 | 0.9999 | 3.21% |
| 57 | 1,2-Dichloroethane         | 107-06-2 | Halogenated hydrocarbons | 0.027 | 0.9997 | 3.43% |
| 58 | 2,2,4-Trimethylpentane     | 540-84-1 | alkane                   | 0.015 | 0.9977 | 3.17% |
| 59 | Heptane                    | 142-82-5 | alkane                   | 0.009 | 0.9997 | 3.12% |
| 60 | trichloroethylene          | 79-01-6  | Halogenated hydrocarbons | 0.02  | 0.9997 | 3.40% |
| 61 | Methylcyclohexane          | 108-87-2 | alkane                   | 0.011 | 0.9978 | 2.63% |
| 62 | 1,2-Dichloropropane        | 78-87-5  | Halogenated hydrocarbons | 0.018 | 0.9999 | 3.56% |
| 63 | Methyl methacrylate        | 80-62-6  | OVOCs                    | 0.029 | 0.9992 | 1.87% |
| 64 | 1,4-Dioxane                | 123-91-1 | OVOCs                    | 0.05  | 0.9992 | 3.26% |
| 65 | Dichloromethane            | 75-27-4  | Halogenated hydrocarbons | 0.024 | 0.9985 | 2.94% |

|    |                           |            |                          |       |        |       |
|----|---------------------------|------------|--------------------------|-------|--------|-------|
| 66 | 2,3,4-Trimethylpentane    | 565-75-3   | alkane                   | 0.009 | 0.9975 | 2.70% |
| 67 | 2-Methylheptane           | 592-27-8   | alkane                   | 0.016 | 0.9974 | 2.40% |
| 68 | Trans-1,3-dichloropropene | 10061-02-6 | Halogenated hydrocarbons | 0.018 | 0.9998 | 3.71% |
| 69 | 3-Methylheptane           | 589-81-1   | alkane                   | 0.013 | 0.9979 | 2.44% |
| 70 | Methyl isobutyl ketone    | 108-10-1   | OVOCs                    | 0.05  | 0.9992 | 3.35% |
| 71 | toluene                   | 108-88-3   | Aromatic hydrocarbons    | 0.011 | 0.9993 | 2.74% |
| 72 | n-octane                  | 111-65-9   | alkane                   | 0.016 | 0.9979 | 2.50% |
| 73 | cis-1,3-dichloropropene   | 10061-01-5 | Halogenated hydrocarbons | 0.007 | 0.9997 | 2.26% |
| 74 | 1,1,2-Trichloroethane     | 79-00-5    | Halogenated hydrocarbons | 0.026 | 0.9996 | 2.56% |
| 75 | tetrachloroethylene       | 127-18-4   | Halogenated hydrocarbons | 0.026 | 0.9997 | 2.82% |
| 76 | 2-Hexanone                | 591-78-6   | OVOCs                    | 0.05  | 0.9992 | 3.13% |
| 77 | Dibromochloromethane      | 124-48-1   | Halogenated hydrocarbons | 0.015 | 0.9966 | 2.67% |
| 78 | 1,2-Dibromoethane         | 106-93-4   | Halogenated hydrocarbons | 0.018 | 0.9998 | 2.62% |
| 79 | chlorobenzene             | 108-90-7   | Halogenated hydrocarbons | 0.011 | 0.9997 | 2.16% |
| 80 | ethylbenzene              | 100-41-4   | Aromatic hydrocarbons    | 0.009 | 0.9997 | 1.23% |
| 81 | m-Xylene                  | 108-38-3   | Aromatic hydrocarbons    | 0.022 | 0.9996 | 1.07% |
| 82 | Paraxylene                | 106-42-3   | Aromatic hydrocarbons    | 0.022 | 0.9996 | 1.07% |
| 83 | Nonane                    | 111-84-2   | alkane                   | 0.022 | 0.9979 | 1.15% |
| 84 | o-xylene                  | 95-47-6    | Aromatic hydrocarbons    | 0.015 | 0.9996 | 1.32% |
| 85 | styrene                   | 100-42-5   | Aromatic hydrocarbons    | 0.018 | 0.9994 | 1.07% |
| 86 | Bromoform                 | 75-25-2    | Halogenated hydrocarbons | 0.022 | 0.9957 | 1.84% |
| 87 | Cumene                    | 98-82-8    | Aromatic hydrocarbons    | 0.013 | 0.9983 | 1.31% |

|     |                           |           |                          |       |        |       |
|-----|---------------------------|-----------|--------------------------|-------|--------|-------|
| 88  | 1,1,2,2-Tetrachloroethane | 79-34-5   | Halogenated hydrocarbons | 0.018 | 0.9993 | 1.87% |
| 89  | Propylene                 | 103-65-1  | Aromatic hydrocarbons    | 0.026 | 0.9983 | 2.31% |
| 90  | m-Ethyltoluene            | 620-14-4  | Aromatic hydrocarbons    | 0.038 | 0.999  | 2.58% |
| 91  | 4-Ethyltoluene            | 622-96-8  | Aromatic hydrocarbons    | 0.027 | 0.999  | 1.46% |
| 92  | 1,3,5-Trimethylbenzene    | 108-67-8  | Aromatic hydrocarbons    | 0.007 | 0.9992 | 1.84% |
| 93  | decane                    | 124-18-5  | alkane                   | 0.038 | 0.9981 | 2.50% |
| 94  | 2-Ethyltoluene            | 611-14-3  | Aromatic hydrocarbons    | 0.022 | 0.9986 | 2.33% |
| 95  | 1,2,4-Trimethylbenzene    | 95-63-6   | Aromatic hydrocarbons    | 0.007 | 0.9978 | 2.52% |
| 96  | 1,3-Dichlorobenzene       | 541-73-1  | Halogenated hydrocarbons | 0.016 | 0.9978 | 3.70% |
| 97  | 1,4-Dichlorobenzene       | 106-46-7  | Halogenated hydrocarbons | 0.024 | 0.997  | 4.56% |
| 98  | 1,2,3-Trimethylbenzene    | 526-73-8  | Aromatic hydrocarbons    | 0.035 | 0.9982 | 2.93% |
| 99  | Benzyl chloride           | 100-44-7  | Halogenated hydrocarbons | 0.013 | 0.9976 | 3.30% |
| 100 | m-Diethylbenzene          | 141-93-5  | Aromatic hydrocarbons    | 0.04  | 0.9964 | 3.09% |
| 101 | p-Diethylbenzene          | 105-05-5  | Aromatic hydrocarbons    | 0.04  | 0.9945 | 3.88% |
| 102 | 1,2-Dichlorobenzene       | 95-50-1   | Halogenated hydrocarbons | 0.007 | 0.9979 | 1.69% |
| 103 | Undecane                  | 1120-21-4 | alkane                   | 0.033 | 0.9942 | 4.58% |
| 104 | Dodecane                  | 112-40-3  | alkane                   | 0.05  | 0.9942 | 4.21% |
| 105 | 1,2,4-Trichlorobenzene    | 120-82-1  | Halogenated hydrocarbons | 0.046 | 0.997  | 4.36% |
| 106 | Hexachloro-1,3-butadiene  | 87-68-3   | Halogenated hydrocarbons | 0.007 | 0.9965 | 2.84% |
| 107 | naphthalene               | 91-20-3   | Aromatic hydrocarbons    | 0.022 | 0.9903 | 3.25% |

Table S1. Summary of details of VOCs analysis.

Briefly, the signal-noise balance is given by the following equation:

$$Noise = \sqrt{\frac{\sum_{i=m}^{m+n} (x_i - \bar{x})^2}{n+1}} \dots\dots\dots (S1)$$

$$SNR(dB) = 20 * \text{Log}_{10}(SNR) \dots\dots\dots (S2)$$

Where

SNR: signal-to-noise ratio;

Signal: the peak signal after deducting the background baseline;

m: the starting point for calculating the background baseline;

m+n: the endpoint of the calculation background baseline;

- is the data value;

- is the average of the data for this segment, which is the background baseline value

SNR(dB) – Signal-to-Noise Ratio (dB)
